# Supplementary material for: Isolation and Identification of a Novel Phlebovirus, Hedi Virus, from Sandflies Collected in China
Source: MDPI journal article supplement (doi:10.3390/v13050772), 2021-04-27
Supplement: s1 [file s1]

Table S1. Primers used for whole-genome sequence amplification of HEDV1867-2.

| Primer Name | Orientation | Sequence (5'-3')                 | Position* |
|-------------|-------------|----------------------------------|-----------|
| L_F1        | Sense       | GACCATCTAGCGACCTCCACACACAAAG     | 1-8       |
| L_R1        | Antisense   | ACTCAGGTTGTCTGAAGCCAT            | 350-331   |
| L_F2        | Sense       | GACAGGTCAACTGTTGGGTCA            | 180-200   |
| L_R2        | Antisense   | CCTCTGTGACGTCCCAATCC             | 732-713   |
| L_F3        | Sense       | GGATTGGGACGTCACAGAGG             | 713-732   |
| L_R3        | Antisense   | TGGTCTGTCTAATGCGCCTG             | 1202-1183 |
| L_F4        | Sense       | GTACGATGATCCTGAGGCCG             | 1145-1162 |
| L_R4        | Antisense   | CTGTGGTCGCCTTATCCTCC             | 2004-1985 |
| L_F5        | Sense       | AATGATGCACCACACCCTGA             | 1926-1945 |
| L_R5        | Antisense   | TGTGCATTCTCTCTCAGC               | 2751-2732 |
| L_F6        | Sense       | GGATGCCGTGTCTCATGCTA             | 2450-2469 |
| L_R6        | Antisense   | TGCATCATCCCTGTGCTTGT             | 3268-3249 |
| L_F7        | Sense       | AGACAACCACAGGGAGCTTG             | 3137-3156 |
| L_R7        | Antisense   | CAGGCTCAATGTCACCCACT             | 4416-4397 |
| L_F8        | Sense       | AGCCCCAAAGACAGGAGAAGA            | 4166-4186 |
| L_R8        | Antisense   | GGTCTTGGTTTTCCCATCACTC           | 5054-5033 |
| L_F9        | Sense       | ACCCAGCCATCACACTTGAG             | 4693-4712 |
| L_R9        | Antisense   | CAACTCATCCTGCGGCATTG             | 5657-5638 |
| L_F10       | Sense       | TAGGTCATGGGCTGAGGACA             | 5333-5352 |
| L_R10       | Antisense   | TCACAAAGACCGCCCAATGA             | 6411-6393 |
| L_F11       | Sense       | TCTTTGGGCCAGCTCATTTCA            | 6037-6057 |
| L_R11       | Antisense   | GACCATCT AGCG ACCT CCAC ACACAAAG | 6412-6405 |
| M_F1        | Sense       | GACCATCT AGCG ACCT CCAC ACACAAAG | 1-8       |
| M_R1        | Antisense   | TCAGTGCAGTCAAAGACCGT             | 314-295   |
| M_F2        | Sense       | AGGCGGCGTACATTGAAGAA             | 7-26      |
| M_R2        | Antisense   | AACTCCTTTATGGTGCGCGA             | 728-709   |
| M_F3        | Sense       | CAAGGTAGATAGCTCGCGCA             | 696-715   |
| M_R3        | Antisense   | AGCAACATTTCAAACCCCGC             | 1163-1150 |
| M_F4        | Sense       | CTGCGCCTAGACGAATGCTA             | 983-1002  |
| M_R4        | Antisense   | CCATGGCTACATGCAACAGC             | 2105-2086 |
| M_F5        | Sense       | GCCTGCAGGGTATCATGGTT             | 1506-1525 |
| M_R5        | Antisense   | AAGCTTGGCACCTATTGCCT             | 2965-2946 |
| M_F6        | Sense       | TTGAGCTGTAGGGAGGGTCA             | 2854-2873 |
| M_R6        | Antisense   | GGGAGCCCTTAAGGTTGTGT             | 3120-3101 |
| M_F7        | Sense       | TTTGAGCAGTGCGGAGGAAT             | 3037-3056 |
| M_R7        | Antisense   | CTGTGCACCCAGGGTTTAGT             | 4251-4232 |

|      |           |                                  |           |
|------|-----------|----------------------------------|-----------|
| M_F8 | Sense     | GCGGACGAGAGGACTGTTTT             | 3754-3773 |
| M_R8 | Antisense | GACCATCT AGCG ACCT CCAC ACACAAAG | 4408-4401 |
| S_F1 | Sense     | GACCATCT AGCG ACCT CCAC ACACAAAG | 1-8       |
| S_R1 | Antisense | TTGGAAACATGAGGCAAGGC             | 423-404   |
| S_F2 | Sense     | CTCACTAGGGTGGCTTCTGC             | 362-381   |
| S_R2 | Antisense | GGCCGAATGGAGTTCCAGAT             | 910-891   |
| S_F3 | Sense     | GCTTGCCACTTTGGGCATAA             | 703-722   |
| S_R3 | Antisense | TTATCGCTCCTGAGGGTGGT             | 1696-1677 |
| S_F4 | Sense     | AAATGTTGTTGTGCCCCACC             | 1494-1513 |
| S_R4 | Antisense | GACCATCT AGCG ACCT CCAC ACACAAAG | 1171-1164 |

\* The positions of the primers corresponding to the nucleic acid sequence of the HEDV1867-2 genome.

Table S2. Strains information used in phylogenetic analyses.

|    | Species                         | Viruses            | Strains    | Date | Country  | Host                    | GenBank Accession Numbers |              |                      |                             |
|----|---------------------------------|--------------------|------------|------|----------|-------------------------|---------------------------|--------------|----------------------|-----------------------------|
|    |                                 |                    |            |      |          |                         | RdRp                      | Polyprotein  | nucleocapsid protein | nonstructural protein (NSs) |
| 1  | <i>Adana phlebovirus</i>        | Adana virus        | 195        | 2012 | Turkey   | Phlebotomus sp.         | YP_009227127              | YP_009227128 | YP_009227130         | YP_009227129                |
| 2  | <i>Aguacate phlebovirus</i>     | Aguacate virus     | VP-175A    | \    | Panama   | Lutzomyia sp.           | YP_004414703              | YP_004414702 | YP_004414705         | YP_004414704                |
| 3  | <i>Alcube phlebovirus</i>       | Alcube virus       | S20        | 2007 | Portugal | Phlebotomus perniciosus | ALG75832                  | ALG75833     | ALG75834             | ALG75835                    |
| 4  | <i>Alenquer phlebovirus</i>     | Alenquer virus     | \          | 1976 | Brazil   | Homo sapiens            | AEA30054                  | AEA30042     | AEA30067             | AEA30066                    |
| 5  | <i>Ambe phlebovirus</i>         | Ambe virus         | BeAr407981 | 1982 | Brazil   | Phlebotominae sp.       | YP_009346030              | YP_009346018 | YP_009346032         | YP_009346031                |
| 6  | <i>Anhanga phlebovirus</i>      | Anhanga virus      | BeAn46852  | 1962 | Brazil   | Choloepus didactylus    | YP_009346019              | YP_009346033 | YP_009346021         | YP_009346020                |
| 7  | <i>Arumowot phlebovirus</i>     | Arumowot virus     | \          | \    | Sudan    | Culex antennatus        | YP_009010958              | YP_009010955 | YP_009010957         | YP_009010956                |
| 8  | <i>Buenaventura phlebovirus</i> | Buenaventura virus | CoAr3319   | 1964 | Colombia | sandfly                 | AKF42410                  | AKF42395     | AKF42365             | AKF42366                    |
| 9  | <i>Bujaru phlebovirus</i>       | Bujaru virus       | BeAn47693  | 1962 | Brazil   | Proechimys guyannensis  | API68880                  | API68881     | API68883             | API68882                    |
| 10 | <i>Cacao phlebovirus</i>        | Cacao virus        | VP-437R    | 1970 | Panama   | Nyssomyia trapidoi      | QCI62731                  | QCI62732     | QCI62733             | QCI62734                    |
| 11 | <i>Campana phlebovirus</i>      | Campana virus      | VP-334K    | 1970 | Panama   | sandfly                 | AKF42423                  | AKF42408     | AKF42392             | AKF42391                    |

|    |                                 |                       |               |      |                                |                         |              |              |              |              |
|----|---------------------------------|-----------------------|---------------|------|--------------------------------|-------------------------|--------------|--------------|--------------|--------------|
| 12 | <i>Candiru<br/>phlebovirus</i>  | Ariquemes virus       | \             | 1988 | Brazil                         | sandfly                 | AEA30056     | AEA30044     | AEA30069     | AEA30068     |
|    |                                 | Candirú virus         | \             | 1967 | Brazil                         | Homo sapiens            | YP_004347993 | YP_004347992 | YP_004347994 | YP_004347995 |
|    |                                 | Jacundá virus         | \             | 1984 | Brazil                         | rodent                  | AEA29965     | AEA29966     | AEA29967     | AEA29968     |
|    |                                 | Morumbi virus         | \             | 1981 | Brazil                         | Homo sapiens            | AEA30061     | AEA30049     | AEA30081     | AEA30080     |
|    |                                 | Mucura virus          | \             | 1981 | Brazil                         | mosquito                | AEA30060     | AEA30048     | AEA30079     | AEA30078     |
|    |                                 | Serra Norte<br>virus  | \             | 1991 | Brazil                         | Homo sapiens            | AEA30063     | AEA30051     | AEA30085     | AEA30084     |
| 13 | <i>Chagres<br/>phlebovirus</i>  | Chagres virus         | \             | \    | Panama                         | Homo sapiens            | AEL29642     | AEL29641     | AEL29643     | AEL29644     |
| 14 | <i>Cocle<br/>phlebovirus</i>    | Coclé virus           | GML244915     | 2009 | Panama                         | Homo sapiens            | AKF42422     | AKF42407     | AKF42389     | AKF42390     |
| 15 | <i>Dashli<br/>phlebovirus</i>   | Dāshlī virus          | \             | 2011 | Iran                           | Sergentomyia sp.        | ALS88184     | ALS88185     | ALS88187     | ALS88186     |
| 16 | <i>Durania<br/>phlebovirus</i>  | Durania virus         | Co Ar 171162  | 1986 | Colombia                       | Lutzomyia sp.           | AEB70976     | AEB70979     | AEB70977     | AEB70978     |
| 17 | <i>Echarate<br/>phlebovirus</i> | Echarate virus        | OBS 6528      | 1998 | Peru                           | Homo sapiens            | AEA30058     | AEA30046     | AEA30073     | AEA30072     |
| 18 | <i>Gabek<br/>phlebovirus</i>    | Gabek Forest<br>virus | Sud AN 754-61 | 1961 | Sudan                          | Acomys cahirinus        | AHK60944     | AHK60929     | AHK60935     | AHK60936     |
| 19 | <i>Gordil<br/>phlebovirus</i>   | Gordil virus          | Dak ANBr 496d | 1984 | Central<br>African<br>Republic | Lemniscomys<br>striatus | AHK60943     | AHK60928     | AHK60934     | AHK60933     |
| 20 | <i>Icoaraci<br/>phlebovirus</i> | Icoaraci virus        | BeAn24262     | 1960 | Brazil                         | rodent                  | QCI62745     | QCI62746     | QCI62747     | QCI62748     |

|    |                               |                       |                       |      |           |                               |              |              |              |              |
|----|-------------------------------|-----------------------|-----------------------|------|-----------|-------------------------------|--------------|--------------|--------------|--------------|
| 21 | <i>Itaituba phlebovirus</i>   | Itaituba virus        | \                     | 1971 | Brazil    | opossum                       | AEA30059     | AEA30047     | AEA30077     | AEA30076     |
| 22 | <i>Itaporanga phlebovirus</i> | Itaporanga virus      | \                     | 1962 | Brazil    | sentinel mouse                | QCI62749     | QCI62750     | QCI62751     | QCI62752     |
| 23 | <i>Ixcanal phlebovirus</i>    | Ixcanal virus         | CA Ar 170897          | \    | Guatemala | Lutzomyia sp.                 | AEB70982     | AEB70983     | AEB70980     | AEB70981     |
| 24 | <i>Karimabad phlebovirus</i>  | Karimabad virus       | I-58                  | 1959 | Iran      | Phlebotomus sp.               | AHK60947     | AHK60932     | AHK60941     | AHK60942     |
| 25 | <i>La Gloria phlebovirus</i>  | La Gloria virus       | SP0584-PA-2014        | 2014 | Panama    | Psychodopygus panamensis      | QBQ01748     | QBQ01749     | QBQ01751     | QBQ01750     |
| 26 | <i>Lara phlebovirus</i>       | Rio Claro virus       | Phlebovirus GGP-2011a | \    | Venezuela | sentinel hamster              | AEL29685     | AEL29686     | AEL29688     | AEL29687     |
| 27 | <i>Leticia phlebovirus</i>    | Leticia virus         | CoAr 171616           | 1987 | Colombia  | Sandfly                       | AEL29649     | AEL29652     | AEL29650     | AEL29651     |
| 28 | <i>Maldonado phlebovirus</i>  | Maldonado virus       | FMD 0077              | 2004 | Peru      | Homo sapiens                  | AEA30055     | AEA30043     | AEA30075     | AEA30074.    |
| 29 | <i>Massilia phlebovirus</i>   | Massilia virus        | 127                   | 2008 | Portugal  | Phlebotomus perniciosus       | ALP32227     | ALP32229     | ALP32231     | ALP32232     |
| 30 | <i>Medjerda phlebovirus</i>   | Medjerda Valley virus | T131                  | 2010 | Tunisia   | Phlebotomus (Larroussius) sp. | ALX81176     | ALX81177     | ALX81179     | ALX81178     |
| 31 | <i>Mona Grita phlebovirus</i> | Mona Grita virus      | SP0260-PA-2014        | 2014 | Panama    | Nyssomyia trapedoi            | QBQ01754     | QBQ01755     | QBQ01757     | QBQ01756     |
| 32 | <i>Mukawa phlebovirus</i>     | Mukawa virus          | MKW73                 | 2013 | Japan     | Ixodes persulcatus            | BBE15818     | BBE15815     | BBE15816     | BBE15817     |
| 33 | <i>Munguba</i>                | Munguba virus         | \                     | 1977 | Brazil    | <i>Nyssomyia</i>              | YP_009346010 | YP_009346034 | YP_009346011 | YP_009346012 |

|    |                                       |                            |                     |      |               |                          |              |              |              |              |
|----|---------------------------------------|----------------------------|---------------------|------|---------------|--------------------------|--------------|--------------|--------------|--------------|
|    | <i>phlebovirus</i>                    |                            |                     |      |               | <i>umbratilis</i>        |              |              |              |              |
| 34 | <i>Naples phlebovirus</i>             | Arrábida virus             | PoSFPheleV/126/2008 | 2008 | Portugal      | Phlebotomine sandflies   | YP_009224693 | YP_009480530 | YP_009480532 | YP_009480531 |
|    |                                       | Granada virus              | GR25                | 2004 | Spain         | sandfly                  | ADO17679*    | ADO17680     | ADO17682     | ADO17681     |
|    |                                       | sandfly fever Naples virus | Toscana             | \    | \             | \                        | YP_089669    | YP_089671    | YP_089668    | YP_089667    |
| 35 | <i>Nique phlebovirus</i>              | Nique virus                |                     | 1972 | Panama        | sandfly                  | AEA30062     | AEA30050     | AEA30083     | AEA30082     |
| 36 | <i>Ntepess phlebovirus</i>            | Ntepess virus              | MRG54-KE-2014       | 2014 | Kenya         | Sergentomyia sp.         | AYC35226     | AYC35223     | AYC35224     | AYC35225     |
| 37 | <i>Odrenisrou phlebovirus</i>         | Odrénisrou virus           | \                   | \    | Cote d'Ivoire | <i>Culex albiventris</i> | AEL29670     | AEL29669     | AEL29671     | AEL29672     |
| 38 | <i>Oriximina phlebovirus</i>          | Oriximiná virus            | \                   | \    | Brazil        | <i>Lutzomyia</i> sp.     | AEA30065     | AEA30053     | AEA30089     | AEA30088     |
| 39 | <i>Pena Blanca phlebovirus</i>        | Pena Blanca virus          | SP1683-PA-2014      | 2014 | Panama        | Psychodopygus panamensis | QBQ01759     | QBQ01760     | QBQ01762     | QBQ01761     |
| 40 | <i>Punique phlebovirus</i>            | Punique virus              | PI-B4-2008          | 2008 | Tunisia       | Phlebotomus sp.          | AFH88995     | AFH88996     | AFH88997     | AFH88998     |
| 41 | <i>Punta Toro phlebovirus</i>         | Capira virus               | VP-366G             | 1970 | Panama        | sandfly                  | AKF42424     | AKF42409*    | AKF42394     | AKF42393     |
|    |                                       | Punta Toro virus           | Adames              | 1970 | Panama        | Homo sapiens             | YP_009512941 | YP_009512940 | YP_009512942 | YP_009512943 |
| 42 | <i>Rift Valley fever phlebovirus*</i> | Rift Valley fever virus    | ZH-548              | 1977 | Egypt         | Homo sapiens             | YP_003848704 | YP_003848705 | YP_003848707 | YP_003848706 |
| 43 | <i>Rio Grande phlebovirus</i>         | Rio Grande virus           | TBM3-204            | 1973 | USA           | Neotoma micropus         | QCI62753     | QCI62754     | QKN22591     | QKN22591     |

|    |                                   |                            |                |      |                          |                               |              |              |              |              |
|----|-----------------------------------|----------------------------|----------------|------|--------------------------|-------------------------------|--------------|--------------|--------------|--------------|
| 44 | <i>Saint Floris phlebovirus</i>   | Saint-Floris virus         | Dak ANB 512    | 1971 | Central African Republic | Tatera sp.                    | AFH88999     | AFH89000     | AFH89001     | AFH89002     |
| 45 | <i>Salanga phlebovirus</i>        | Salanga virus              | AnB 904a       | 1971 | Central African Republic | Aethomys medicatus            | AGZ62535     | AGZ62536     | AGZ62538     | AGZ62537     |
| 46 | <i>Salehabad phlebovirus</i>      | Arbia virus                | ISS PHL18      | 1980 | Italy                    | Phlebotomus perniciosus       | AGA82737     | AGA82738     | AGA82739     | AGA82740*    |
|    |                                   | Salehabad virus            | I-81           | 1959 | Iran                     | Phlebotomus sp.               | AGA82741     | AGA82742     | AGA82743     | AGA82744*    |
| 47 | <i>Salobo phlabovirus</i>         | Salobo virus               | \              | \    | Brazil                   | <i>Proechimys guyannensis</i> | AED98383     | AED98380     | AED98382     | AED9838      |
| 48 | <i>Sicilian phlebovirus</i>       | Sandfly fever Turkey virus | Izmir 19       | 2008 | Turkey                   | Homo sapiens                  | YP_004382743 | YP_004382742 | YP_004382744 | YP_004382745 |
| 49 | <i>Tapara phlebovirus</i>         | Tapara virus               | BeAr413570     | 1983 | Brazil                   | Phlebotominae sp.             | YP_009346035 | YP_009346022 | YP_009346024 | YP_009346023 |
| 50 | <i>Tehran phlebovirus</i>         | Tehran virus               | I-47           | 1976 | Iran                     | Phlebotomus perfiliewi        | AFH89011     | AFH89012     | AFH89013     | AFH89014     |
| 51 | <i>Tico phebovirus</i>            | Tico virus                 | SP0157-PA-2013 | 2013 | Panama                   | Lutzomyia sp.                 | QBQ01764     | QBQ01765     | QBQ01767     | QBQ01766     |
| 52 | <i>Toros phlebovirus</i>          | Toros virus                | 213            | \    | Turkey                   | Phlebotomus sp.               | YP_009246447 | YP_009480527 | YP_009480529 | YP_009480528 |
| 53 | <i>Toscana phlebovirus</i>        | Toscana virus              | H4906          | 2004 | France                   | Homo sapiens                  | \            | AMY16462     | AMY16463     | AMY16464     |
| 54 | <i>Tres Almendras phlebovirus</i> | Tres Almendras virus       | SP0412-PA-2013 | 2013 | Panama                   | Psychodopygus panamensis      | QBQ01768     | QBQ01769     | QBQ01771     | QBQ01770     |
| 55 | <i>Turuna phlebovirus</i>         | Turuna virus               | \              | 1978 | Brazil                   | sandfly                       | AEA30064     | AEA30052     | AEA30087     | AEA30086     |

|    |                                 |                |                 |      |        |                           |              |              |              |              |
|----|---------------------------------|----------------|-----------------|------|--------|---------------------------|--------------|--------------|--------------|--------------|
| 56 | <i>Uriurana<br/>phlebovirus</i> | Uriurana virus | BeAr479776      | 1985 | Brazil | Phlebotominae sp.         | YP_009346036 | YP_009346025 | YP_009346038 | YP_009346037 |
| 57 | <i>Urucuri<br/>phlebovirus</i>  | Urucuri virus  | BeAn100049      | 1966 | Brazil | Proechimys<br>guyannensis | YP_009346026 | YP_009346027 | YP_009346029 | YP_009346028 |
| 58 | <i>Viola phlebovirus</i>        | Viola virus    | BR/MT_PanAr2015 | 2015 | Brazil | Lutzomyia sp.             | AWH90184     | AWH90183     | \            | \            |
| 59 | <i>Zerdali<br/>phlebovirus</i>  | Zerdali virus  | 37              | \    | Turkey | Phlebotomus sp.           | YP_009246413 | YP_009480524 | YP_009480526 | YP_009480525 |

---
