# Supplementary material for: Isolation and Identification of a Novel Phlebovirus, Hedi Virus, from Sandflies Collected in China
Source: MDPI journal article supplement (doi:10.3390/v13050772), 2021-04-27
Supplement: s1 [file s1]

| Species Prototype Virus    |   | Premotif A                                       | Motif A   | Motif B                     | Motif C    | Motif D     | Motif E |
|----------------------------|---|--------------------------------------------------|-----------|-----------------------------|------------|-------------|---------|
|                            |   | *****                                            | *****     | *****                       | *****      | *****       | *****   |
| Bujaru virus               | : | LFKKQHGGREIYVNGABERIVSVVETIARQIGEFPSDTLCNPNKTIPE | TSDDARKWN | PWIGKATFLKRTGMMQGIHHTSSLLHT | MQGSDSSMLI | IYPSERSTPNT | ENSEF   |
| Chandiru virus             | : | LFKKQHGGREIYVNGABERIVSVVETIARQIGEFPSDTLCNPNKTIPE | TSDDARKWN | PWIGATFLKRTGMMQGIHHTSSLLHT  | MQGSDSSMLI | IYPSERSTPNT | ENSEF   |
| Frijoles virus             | : | LFKKQHGGREIYVNGABERIVSVVETIARQIGEFPSDTLCNPNKTIPE | TSDDARKWN | PWIGRTYLGRTGMMQGIHHTSSLLHT  | MQGSDSSMLV | IYPSERSTPNT | ENSEF   |
| Mukawa virus               | : | LFKKQHGGREIYVNGABERIVSVVETIARQIGEFPSDTLCNPNKTIPE | TSDDARKWN | PWIGCSYLETETGMMQGIHHTSSLLHT | MQGSDSSAMI | IYPSERSTPNT | ENSEF   |
| Punta Toro virus           | : | LFKKQHGGREIYVNGABERIVSVVETIARQIGEFPSDTLCNPNKTIPE | TSDDARKWN | PWIGATFIKRTGMMQGIHHTSSLLHT  | MQGSDSSMLL | IYPSERSTPNT | ENSEF   |
| Rift Valley fever virus    | : | LFKKQHGGREIYVNGABERIVSVVETIARQIGEFPSDTLCNPNKTIPE | TSDDARKWN | PWIGATYLETETGMMQGIHHTSSLLHT | MQGSDSSMLI | IYPSERSTPNT | ENSEF   |
| Salehabad virus            | : | LFKKQHGGREIYVNGABERIVSVVETIARQIGEFPSDTLCNPNKTIPE | TSDDARKWN | PWIGCTYLGRTGMMQGIHHTSSLLHT  | MQGSDSSMLI | IYPSERSTPNT | ENSEF   |
| Sandfly fever Naples virus | : | LFKKQHGGREIYVNGABERIVSVVETIARQIGEFPSDTLCNPNKTIPE | TSDDARKWN | PWIGCTYLGRTGMMQGIHHTSSLLHS  | MQGSDSSMLI | IYPSERSTPNT | ENSEF   |
| Ukuniemi virus             | : | LFKKQHGGREIYVNGABERIVSVVETIARQIGEFPSDTLCNPNKTIPE | TSDDARKWN | PWIGGAFVQRTGMMQGIHHTSSLLHT  | LQSDSSAMI  | IYPSERSTPNT | ENSEF   |
| HEDV1867-2                 | : | LFKKQHGGREIYVNGABERIVSVVETIARQIGEFPSDTLCNPNKTIPE | TSDDARKWN | PWIGRTYLGRTGMMQGIHHTSSLLHT  | MQGSDSSMLI | IYPSERSTPNT | ENSEF   |

B

| Species Prototype Virus    |   | *                                                                                                                  | 20           | * | 40 | * | 60 | * | 80 | * | 100 | * | 120 |
|----------------------------|---|--------------------------------------------------------------------------------------------------------------------|--------------|---|----|---|----|---|----|---|-----|---|-----|
|                            |   | *                                                                                                                  |              | * |    | * |    | * |    | * |     | * | PD  |
| Bujaru virus               | : | MDAIIILNQPEL-RRGFNRRAIENYRDTLMAMELDFDSLEKIPGALKIELSLDLPNSTVGSILRDNPAIIVESDSLSLIINVTVGILASHIDKMFSSVFPIKN---         | DGFGDHTPDMLI |   |    |   |    |   |    |   |     |   |     |
| Chandiru virus             | : | MBEILNKQIPEGVGLFRPEIKQYDSDIMDEIPEFHITKCDGYMKIDLDLNGVDYSTVGSLLI--STIEVPDKSLPNLVIVVFSLASTDVRFSVFQVYA---              | DSYDHLSPDMLI |   |    |   |    |   |    |   |     |   |     |
| Frijoles virus             | : | MDIISKQVEL-ADGFNRRLNLEHYNEILLDTPIPEFSVSKESGSIISILVGLDQDRSTVGSLLK--PEKVQSAKLPNVFVDFTFGLSGSTDRAFISEPSPVD---          | DGFNFMSPDMLI |   |    |   |    |   |    |   |     |   |     |
| Mukawa virus               | : | MEPILSRIG-N-FQGQKPVQVHHEADLFTALPSFQVSNKAGLSLDVNEEDLDRESTVGSITIT--KDQVIMDQILNFVDFTFGLTKSTDRFSEAPLIG---              | DGFGDHTPDMLI |   |    |   |    |   |    |   |     |   |     |
| Punta Toro virus           | : | MESLRRKQITN-NEGFFKPELRHSDHDLNADLPFLVERSSNKIVIDLNLDPNPNSTVGSLLT--SVSIEIPEKNLMNMVDFTFGLIADSTDVKLSKSGFIVG---          | DGYDHLSPDMLI |   |    |   |    |   |    |   |     |   |     |
| Rift Valley fever virus    | : | MDSILSKQLVD-KTGFYRVPKHFCDTMLTLALPTFDVSKMVDRIITDFNLDDIQGASEIGSTLL--PMSIDVEDMANFVDFTFGLADKTDLRLMREFPMMN---           | DGFDHLSPDMLI |   |    |   |    |   |    |   |     |   |     |
| Salehabad virus            | : | INELLAKQAHL-RQGFSSGALMHYDDETLHLPIDPFFVRRSLEGILIDLSDLQDSSSTVGSLLM--PNVDVKATSIIPNFIDNFTFGLSSSTDQPFSSKFPVIN---        | DGFDLTPDMLI  |   |    |   |    |   |    |   |     |   |     |
| Sandfly fever Naples virus | : | MERILKKQAP-VRALTIHPLRRYESSYDTPIPAYVIKHSSDGVTIDIASLADL-QGSGSTIQ--PFESVPAQNLTLEKIDFTFGLADTDDKKFVEVGVLENRADDSDQSPDMLI |              |   |    |   |    |   |    |   |     |   |     |
| Ukuniemi virus             | : | MLLATCSRTIR-QQGLNCPPAVTFSSHMRPPIPSFLWLTEGSDVLMDFDLDTIPAGSVTGSIG--PKFKIKTQAASSFVDFTFGLWCDASDMLRDHAPLVN---           | DTFDHWTDFIS  |   |    |   |    |   |    |   |     |   |     |
| HEDV1867-2                 | : | INDILLKQPEL-RPGFTKRELRYHDETLFGVGLPEFSISRVKQIDLEIAVETLDDRSTVGSILLREPLIRIDPKNSLNFVDFTFGLCNSTDORRFSTVFPIMN---         | DGFDNLSPDMLI |   |    |   |    |   |    |   |     |   |     |

| Species Prototype Virus    |   | *                                                                                                                     | 140 | *    | 160 | * | 180 | * | 200 | * | 220 | * | 240 |
|----------------------------|---|-----------------------------------------------------------------------------------------------------------------------|-----|------|-----|---|-----|---|-----|---|-----|---|-----|
|                            |   | E *T                                                                                                                  |     | K ** | **  |   |     | * | *   | * |     | * | *   |
| Bujaru virus               | : | QTTAGAYYVDFTFRGSEEGAA-QAALTMLAKVEIPCMNRSDGETLSLSVSVHRSVGVSALASEDDVNLVFRFLVAIFYEAM--KVQPELNDDSELKAEKEVLGTISMISMDIE     |     |      |     |   |     |   |     |   |     |   |     |
| Chandiru virus             | : | KTAAGSHHVDFTFNRGGEGAF-QACKDRSRYIIPCNRAVGGRVSLFVSVYVRGVWSNLDLTDDEVNLVFRFLVAIMEEAK--RYYPELDESEMTKQEREILGIVSSIQMDIK      |     |      |     |   |     |   |     |   |     |   |     |
| Frijoles virus             | : | KTTSGSIYVDFTFRGGEDGAK-QAIGKIGKVEACENRSRGRKLCISLVSVHRHGVSNLLEEQVNLVFRFLVAISIFEDIK--ILLPEVSTIDEELTKSERETGLASSLTIND      |     |      |     |   |     |   |     |   |     |   |     |
| Mukawa virus               | : | ITPGQRVYVDFTFNRGNERQAE-QAAYTKAKVEIACENRSSIMPIMLCVISVHRDGVWSNPLTQAEVDNLVFRFLVAIFGEIR--EMSPDALKDDPELSKTEREVLGISQIPLDIE  |     |      |     |   |     |   |     |   |     |   |     |
| Punta Toro virus           | : | ETTSGSYIVDFTFRGSERQCL-NAKDKRAKYIACENRSRNAPVSLYIVAVHRDGLWTNMTMQEEVNLVFRFLVAISIHESR--KIQPELTDDSDLSKSERELLGTLSSIDLDD     |     |      |     |   |     |   |     |   |     |   |     |
| Rift Valley fever virus    | : | KTTSGMYNVDFTFRGDERGAF-QAMTKLAKVEVPCENRSRQRTVVIYVVSAYRHGVWSNLEDESEAFIMVYRRLALSVMDLR--TLFPELSTDEELGKTERELLAMVSSIQINDS   |     |      |     |   |     |   |     |   |     |   |     |
| Salehabad virus            | : | QSTAGSYHVDFTFRGREGAR-QAASLKLAKVEQACNRVSGRNVGLYIAVHRGGVWTNIMSKEDVDLCYRMLAEALFADIQ--VVGPEYRMADEEATKLEREMMGIVASIGMDIS    |     |      |     |   |     |   |     |   |     |   |     |
| Sandfly fever Naples virus | : | ETETGHVYVDFTFMGDANSAD-LAARNKLAKVEIACLNRSIAIKPISLYIIVAVHFGVTSNLDLSDEEVNLVFRFLVARDIFFEEL--EINPALFDSDETSRLREVNVSMAIQIDDD |     |      |     |   |     |   |     |   |     |   |     |
| Ukuniemi virus             | : | QRLDGSKVYVDFTFNRSDQEQSLISAFNRVQKVEVALINRSTSSILFGVVVSETTVVTLNALKQEEVDLCFRFLVRAVHLEMTTKMIIPEYDDEDED--KRSREVKAAFHSVQPDN  |     |      |     |   |     |   |     |   |     |   |     |
| HEDV1867-2                 | : | QTTAGGHVYVDFTFRGTEKGAR-NAANLRFKVEVACENRAGQAGLALHVIISTHISGVWSNLDLEEEANMIFRFLVAISIFEELK--IMPELRADDELGQERAVLGVVSSIIMDD   |     |      |     |   |     |   |     |   |     |   |     |

Figure S1. Sequence alignment of the conserved polymerase motifs (A) and endonuclease domain (B) of representative strains of *Phlebovirus* and HEDV1867-2. The conserved residues in the domain are identified by asterisks. The highly conserved endonuclease residues are shown in bold.

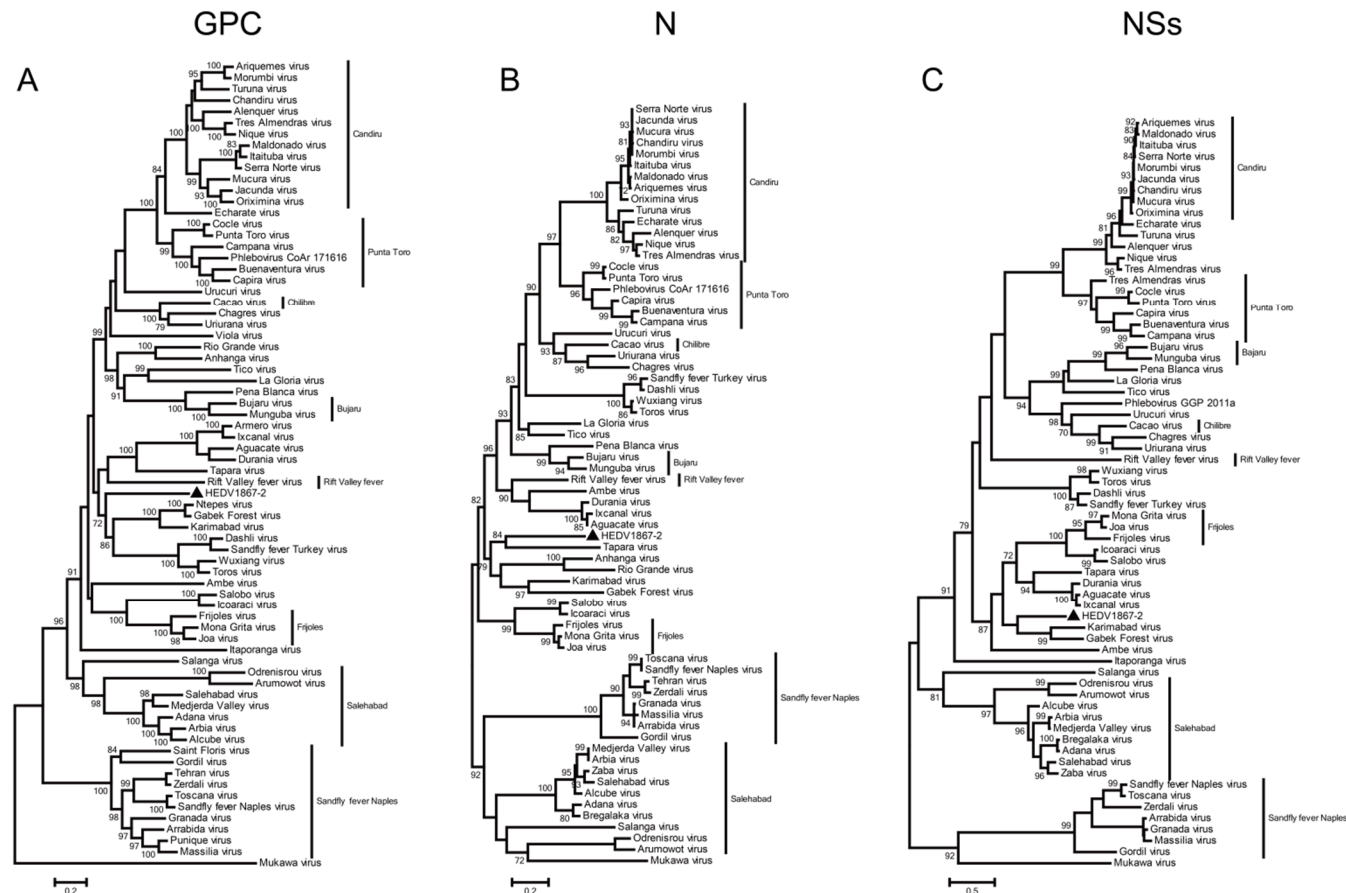

Figure S2. The evolutionary relationships of (A) GPC proteins, (B) N proteins, and (C) NSs proteins of HEDV1867-2 and 59 other phleboviruses based on maximum likelihood phylogenetic analysis. The HEDV1867-2 virus identified in this study was marked with black triangles.

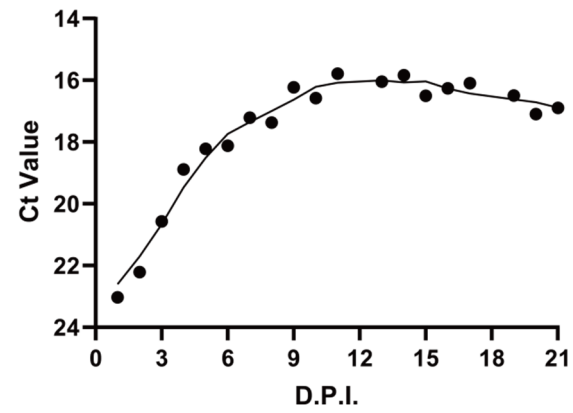

Figure S3. Proliferation curve of HEDV1867-2-infected BHK-21 cells.
